# Supplementary material for: Five-year records of Total Mercury Deposition flux at GMOS sites in the Northern and Southern Hemispheres
Source: Copernicus journal article supplement (doi:10.5194/acp-2016-517), 2016-07-20
Supplement: Supplementary file [file acp-2016-517-RC2-supplement.pdf]

## **Review of the manuscript: Five-years records of the total mercury deposition flux at GMOS sites in the northern and southern hemisphere**

The paper by Sprovieri et al. deals with Hg deposition fluxes in N and S Hemispheres at different sites as a part of GMOS project. The paper provides comprehensive data and discussion in relation to temporal and spatial variability of Hg deposition fluxes on a global scale, particularly in regions, such as S Hemisphere and tropical areas where atmospheric Hg species have not been investigated before. These data present valuable information about the current status of Hg cycling as a global pollutant and for future modelling, which could be interesting to a broader scientific community. Even more, the study represents an important input for future planning and management in relation to environmental changes. I suggest publication after moderate revision taking into account the following comments:

1. The paper deals only by wet deposition. What about dry deposition? The title should be changed then to "...Hg wet deposition fluxes..."
2. P6 - What is the uncertainty of Hg wet deposition flux calculations?
3. The data in the manuscript should be provided according to the precision of measurements.
4. Although the Hg source identification is not the subject of the present paper it would be interesting to make a comparison with the study performed by Sun et al. ES&T, 2014. There are several parts in the manuscript where sources of Hg are discussed, which could be further supported by stable isotope analysis especially in China and their relation to global emissions (P20).
5. The spell-checking is needed throughout the paper – several typos present.
